1 **ForageGrassBase: Molecular resource for the forage grass *Festuca***  
2 ***pratensis* Huds.**

3

4 Jeevan Karloss Antony Samy: [jeevan.karloss@nmbu.no](mailto:jeevan.karloss@nmbu.no)

5 Odd Arne Rognli: [odd-arne.rognli@nmbu.no](mailto:odd-arne.rognli@nmbu.no)

6 Mallikarjuna Rao Kovi: [mallikarjuna.rao.kovi@nmbu.no](mailto:mallikarjuna.rao.kovi@nmbu.no)

7

8 **Institute address:**

9 Department of Plant Sciences (IPV), Faculty of Biosciences (BIOVIT), Norwegian University of Life  
10 Sciences (NMBU), Ås, Akershus, 1432, Norway.

11

12 **Corresponding authors:** Mallikarjuna Rao Kovi

13 E. mail: [mallikarjuna.rao.kovi@nmbu.no](mailto:mallikarjuna.rao.kovi@nmbu.no)

14 Tel: +47-40566127

15

16

17

18

19

20

21

22

23

24

25

26

27

28

29

30

31

## 32 **Abstract**

### 33 **Background**

34 Meadow fescue (*Festuca pratensis* Huds.) is one of the most important forage grasses in  
35 temperate regions. *F. pratensis* is a diploid ( $2n = 14$ ) outbreeding species that belongs to the  
36 genus *Festuca*. Together with *Lolium*, they are the most important genera of forage grasses  
37 in temperate regions. *F. pratensis* has good winter survival, with high quality dry matter  
38 yields and persistency, and is suitable both for frequent-cutting conservation regimes and  
39 for grazing. It is a significant component of species-rich permanent pastures in the  
40 temperate regions, ensuring high forage yield under harsh climatic conditions where other  
41 productive forage grass species are unable to grow. However, genomic resources for *F.*  
42 *Pratensis* is not available so far.

43

### 44 **Results**

45 The draft genome sequences of two *F. pratensis* genotypes “HF7/2” and “B14/16” are  
46 reported in this study. Here, using the draft genome, functional annotation datasets of two  
47 *F. pratensis* cultivars, we have constructed the *F. pratensis* genome  
48 database <http://foragegrass.org/>, the first open-access platform to provide comprehensive  
49 genomic resources related to this forage grass species. The current version of this database  
50 provides the most up-to-date draft genome sequence along with structural and functional  
51 annotations for genes using Genome Browser (GBrowse). In addition, we have integrated  
52 comparative genomic tracks for *F. pratensis* genomes by mapping *F. pratensis* genome to the  
53 barley, rice, *Brachypodium* and maize genomes. We have integrated homologous search tool  
54 BLAST also for the users to analyze their data. Combined, GBrowse, BLAST and downloadable  
55 data gives an user friendly access to *F. pratensis* genomic resources. All data in the database  
56 were manually curated.

57

### 58 **Conclusion**

59 To our knowledge, ForageGrassBase is the first genome database dedicated to forage  
60 grasses. It provides valuable resources for a range of research fields related to *F.*  
61 *pratensis* and other forage crop species, as well as for plant research communities in

62 general. The genome database can be accessed at <http://foragegrass.org>. In the near future,  
63 we will expand the ForageGrassBase by adding genomic tools for other forage grass species,  
64 as soon as their genomes become available.

65

## 66 **Keywords**

67 *Festuca pratensis*, meadow fescue, forage grass database, molecular data, online molecular  
68 database, genomic data resources, Gbrowse

69

70

## 71 **Background**

72 Grasslands are covering very large portions of the earth's surface and they are important as  
73 feed sources and pastures for livestock. In both developed and developing countries, many  
74 millions of livestock farmers, ranchers and pastoralists depend on grasslands and conserved  
75 products such as hay and silage from a range of fodder crops for their livelihoods. Among  
76 several forage crops, meadow fescue (*Festuca pratensis* Huds.) is one of the most important  
77 forage grass species in temperate regions of the world. It is a diploid ( $2n = 14$ ) outbreeding  
78 species that belongs to the genus *Festuca* (1)

79

80 Fescues in general have evolved superior adaptations to abiotic stresses, e.g., winter  
81 survival in meadow fescue. The most abundant forage grass species in temperate regions,  
82 perennial ryegrass (*Lolium perenne* L.), is known for its superior nutritive quality, rapid  
83 establishment and growth but is lacking persistency under harsh environmental conditions.  
84 The *Lolium-Festuca* species complex is unique since it is possible to combine *Lolium* and  
85 *Festuca* genomes in interspecific hybrids (*Festulolium*) (2). Complementation of traits in  
86 *Festulolium* hybrids is thus a very interesting strategy for developing novel germplasm and  
87 cultivars with improved quality and persistency, which can contribute to a sustainable  
88 forage production. Relatively modest genomic resources have been developed for meadow  
89 fescue compared with other grass species like perennial ryegrass (*Lolium perenne*) (3).

90

91 In order to develop better *Festulolium* hybrids, we have initiated sequencing of *F. pratensis*,  
92 and combined with an efficient utilization of the close relationship with barley (*Hordeum*  
93 *vulgare*), rice (*Oryza sativa*), *Brachypodium distachyon* and maize (*Zea mays*) through  
94 comparative genomics approaches. High quality annotated *Festuca* genomes are now

95 available. As a first step, the genome sequences and genome annotations for two *F.*  
96 *pratensis* genotypes are made available through ForageGrassBase (<http://foragegrass.org>).  
97 ForageGrassBase was developed to make these substantial amounts of genomic data  
98 accessible through visualizations and analytic tools in a common framework. Similar  
99 resources for other forage grass species will be added to ForageGrassBase when they  
100 become available.

101

## 102 **Construction and content**

103 Bootstrap (HTML, CSS), Javascript, PHP and Python were used to develop ForageGrassBase.  
104 The Generic Genome Browser (GBrowse) [4] and BLAST [5] were also installed. R packages  
105 are used for BLAST results visualizations.

106 *De novo* sequencing of the *Festuca pratensis* genomes were performed using Illumina mate  
107 pair sequencing and assembly was performed by the SOAPDenovo assembler. Furthermore,  
108 gene annotation was performed by in-house developed annotation pipelines and python  
109 scripts.

110

## 111 **Utility and discussion**

### 112 **Genome browser (GBrowse)**

113 The generic genome browser (GBrowse) is simple and one of the most used genome  
114 browsers for visualization of genomes. We installed GBrowse to visualize and share genomic  
115 data of *F. pratensis* (Fig. 1). Currently, ForageGrassBase contains molecular data of two  
116 *Festuca pratensis* genotypes; Festuca HF2/7, a Norwegian genotype originating from a  
117 population selected for high frost tolerance and a Yugoslavian genotype, B14/1700, which is  
118 used by our group to develop a mapping family for linkage map construction (6). Further, a  
119 comparative genome analysis was performed against other grass species like barley,  
120 Brachypodium, rice and maize. These comparative genomics tracks consisting of gene  
121 names and chromosome positions were added to the genome browsers (Fig. 1). More data  
122 and tracks will be added in the near future for other economically important forage grass  
123 species like timothy (*Phleum pratense*) to expand the forage grass genomics resources in  
124 ForageGrassBase .

125

### 126 **BLAST server**

127 We have installed a BLAST server to search for homologous regions in the *F. pratensis*  
128 genome. Users having unknown sequences can use BLAST search to find the homologous  
129 regions in *Festuca* and their corresponding homologous genes and their physical location in  
130 *Brachypodium*, , barley, rice and maize (Fig. 2a). After the search, our algorithm chooses the  
131 best hits and plots them in a unique way. BLAST results are connected to GBrowse, so the  
132 users can view the homologous regions and nearby genes and other genomic features in all  
133 these species (Fig. 2b).

134

### 135 **Future plans and integrations**

136 ForageGrassBase was developed based on high interest for the molecular data of *Festuca*  
137 *pratensis*. Genetic variations and gene expression data will be added using Genetic variation  
138 browser (GVBrowser) and Gene expression browser (GEBrowser) in the very near future.  
139 Due to rapid developments and lower costs of high-throughput sequencing technologies,  
140 we expect more forage grass genome sequence data to be available soon, and these  
141 resources and new tools will be added under ForageGrassBase.

142

### 143 **Database access and feedback**

144 All the data used in developing this database are available through the 'Download' menu in  
145 ForageGrassBase. Genome sequences and gene annotation files for the two *Festuca*  
146 genotypes are available in "fasta" and "gff3" file formats to download and re-use. Users can  
147 send their questions and comments through 'Contact form' under 'Contact' menu.

148

### 149 **Conclusions**

150 To the best of our knowledge, ForageGrassBase is the only online database to access,  
151 visualize and download data for the forage grass species *Festuca pratensis* and its  
152 homologous sequences/genes in rice, barley, *Brachypodium* and maize. Due to rapid  
153 developments in high-throughput sequencing technology in recent years, we expect a huge  
154 influx of data for forage grasses. Thus, the database ForageGrassBase will be updated by  
155 adding new forage grass species genomic resources as soon as their genome sequences are  
156 publicly available.

157

### 158 **List of abbreviations**

159 *F. pratensis*: *Festuca pratensis*

160 GBrowser: Genome browser  
161 BLAST: Basic Local Alignment Search Tool  
162

163

## 164 **Declarations**

## 165 **Acknowledgements**

166 We thank Torben Asp, Aarhus University, Dag Inge Våge, Teshome Dagne Mulugeta, Torfinn  
167 Nome and the Orion computational facility at the Norwegian University of Life Sciences for  
168 their support.

169

## 170 **Funding**

171 This project has received financial support from the Research Council of Norway, project  
172 numbers: 199664/I10 (VARCLIM), 255428 (GenSelTim) and 208481 (ELIXIR.NO). The funding  
173 source had no role in study design, data collection and interpretation and in writing the  
174 manuscript.

175

## 176 **Availability and requirements**

177 ForageGrassBase can be accessed at <https://foragegrass.org/>

178

## 179 **Availability of data and materials**

180 This work does not contain additional data.

181

## 182 **Authors' contributions**

183 MRK, JKAS and OAR conceived the idea of developing ForageGrassBase. OAR, MRK provided  
184 the genome sequences and annotation files. JKAS developed ForageGrassBase with inputs  
185 from MRK and OAR. JKAS and MRK wrote the manuscript and included comments from  
186 OAR. All authors read and approved the final manuscript.

187

## 188 **Competing interests**

189 The authors declare that they have no competing interests.

190

## 191 **Consent to publish**

192 Not applicable.

193

#### 194 **Ethics approval and consent to participate**

195 Not applicable

196

197

#### 198 **Figure legends**

199 **Fig. 1:** ForageGrassBase genome browser contains *F. pratensis* genome annotation and their  
200 orthologous regions in Brachypodium, barley, maize and rice.

201 **Fig. 2:** *F. pratensis* cultivars genome browsers with genome annotations and BLAST tool (a)  
202 BLAST tool implemented to search for homologous regions in the reference genomes  
203 available. (b) BLAST results page shows the homologous regions.

204

#### 205 **References**

- 206 1. Rognli OA, Saha MC, Bhamidimarri S, van der Heijden S. Fescues. In 'B. Boller et al.  
207 (eds.), Fodder Crops and Amenity Grasses, Handbook of Plant Breeding 5, 2010; DOI  
208 10.1007/978-1-4419-0760-8\_11, Springer Science+Business Media, pp 261-292.
- 209 2. Ghesquière M, Humphreys MW, Zwierzykowski Z. Festulolium. B. Boller et al. (eds.),  
210 Fodder Crops and Amenity Grasses, Handbook of Plant Breeding 5, 2010; DOI  
211 10.1007/978-1-4419-0760-8\_12, Springer Science+Business Media, LLC 2010, pp  
212 293-316.
- 213 3. Byrne SL, Nagy I, Pfeifer M, Armstead I, Swain S, Studer B, Mayer K, Campbell JD,  
214 Czaban A, Hentrup S, et al. A synteny-based draft genome sequence of the forage  
215 grass *Lolium perenne*. *Plant J.* 2015; 84(4):816–26.
- 216 4. Donlin MJ. Using the Generic Genome Browser (GBrowse). *Curr Protoc*  
217 *Bioinformatics* 2009, Chapter 9:Unit 9 9.
- 218 5. Altschul SF, Gish W, Miller W, Myers EW, Lipman DJ. Basic local alignment search  
219 tool. *J Mol Biol* 1990, 215(3):403-410.
- 220 6. Alm V, Fang C, Busso CS, Devos KM, Vollan K, Grieg Z, Rognli OA. A linkage map of  
221 meadow fescue (*Festuca pratensis* Huds.) and comparative mapping with other  
222 Poaceae species. *Theor Appl Genet* 2003, 108 (1):25-40.

223

224

# ForageGrassBase

Molecular Data Resource for Forage Grasses

File Help

HF 2 6A: 11 kbp from 51503358:1..11,000

Browser [Select Tracks](#) [Snapshots](#) [Custom Tracks](#) [Preferences](#)

Search

Landmark or Region:

51503358:1..11,000

Search

Download Sequence File Configure... Go

Save Snapshot Load Snapshot

Examples: [AMP1](#), [51755314](#).

Data Source

HF 2 6A

Scroll/Zoom: << < - Show 11 kbp + > >> Flip

Overview

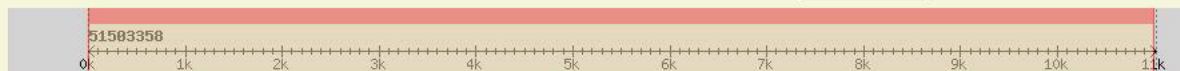

Region

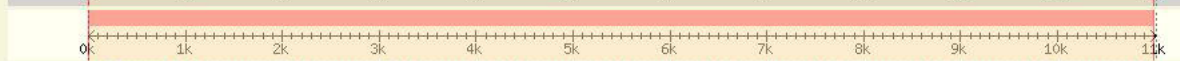

Details

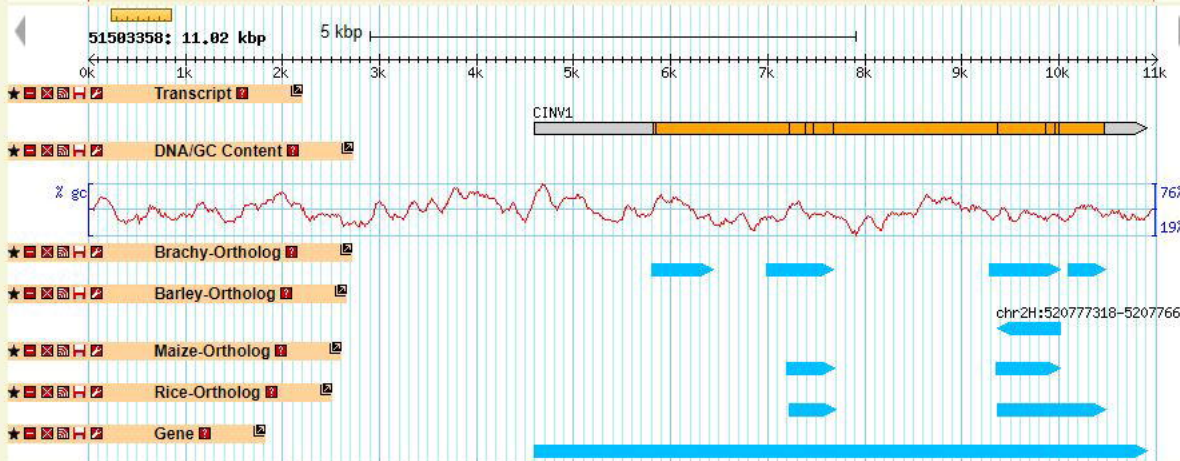

Select Tracks Clear highlighting



**A**

Or, upload file  
 No file chosen

Choose database

blastn  
 megablast  
 tblastn

Choose output format  
 Table  
 Alignment

E-value:

**B**

## ForageGrassBase BLAST search results

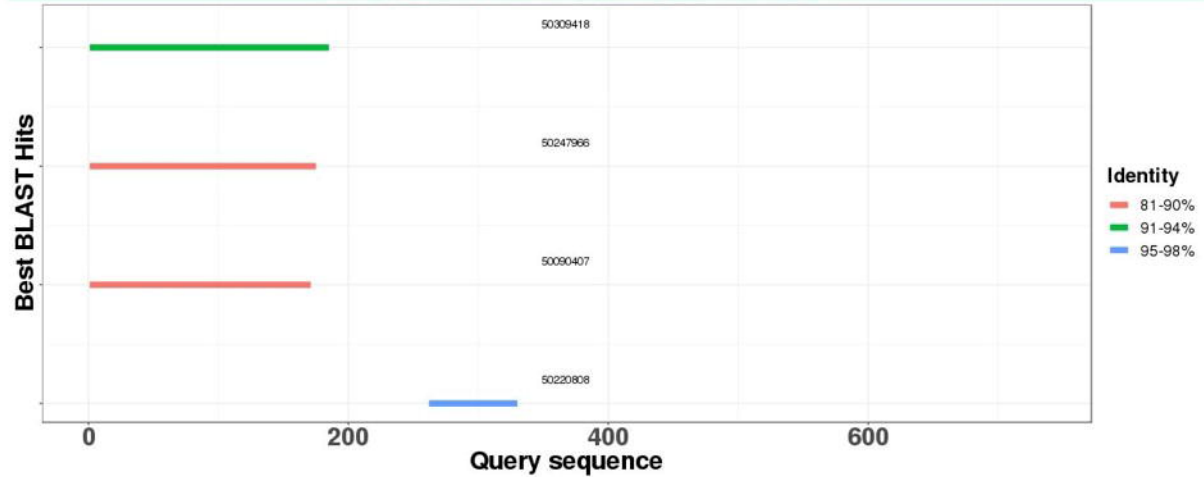

| Query                   | Subject  | Identity | Length | Mismatches | Gaps | QStart | QEnd | SStart | SEnd | Score | E-Value | GBrowse View                 |
|-------------------------|----------|----------|--------|------------|------|--------|------|--------|------|-------|---------|------------------------------|
| ENA/AAW73220/AAW73220.1 | 50309418 | 93.51    | 185    | 12         | 0    | 1      | 185  | 2473   | 2289 | 276   | 3e-72   | <a href="#">GBrowse View</a> |
| ENA/AAW73220/AAW73220.1 | 50247966 | 89.71    | 175    | 18         | 0    | 1      | 175  | 4347   | 4521 | 224   | 1e-56   | <a href="#">GBrowse View</a> |
| ENA/AAW73220/AAW73220.1 | 50090407 | 87.79    | 172    | 19         | 2    | 1      | 171  | 8723   | 8553 | 200   | 2e-49   | <a href="#">GBrowse View</a> |
| ENA/AAW73220/AAW73220.1 | 50220808 | 97.10    | 69     | 2          | 0    | 262    | 330  | 6311   | 6243 | 117   | 2e-24   | <a href="#">GBrowse View</a> |
